# Supplementary material
Source: PubMed Central journal article supplement (PMC3204839)
Supplement: JCI57728sd.pdf [file JCI57728sd.pdf]

## SUPPLEMENTARY TABLE 1

Gene name and nucleotide composition for primers used in real-time PCR. Cycling parameters are described in references.

| <b>Gene</b>        | <b>Primer Sequences</b>                                                    |
|--------------------|----------------------------------------------------------------------------|
| <i>Hprt</i> (1)    | For: 5'-AGCCTAAGATGAGCGCAAGT-3'<br>Rev: 5'-TTACTAGGCAGATGGCCACA-3'         |
| <i>Stat1</i> *     | For: 5'-CCTGCAACTGAAGGAACAGA-3'<br>Rev: 5'-TCACCACGACAGGAAGAGAG-3'         |
| <i>Stat6</i> (2)   | For: 5'-GACTATGGTAGAGGACAGTTGCCTAA-3'<br>Rev: 5'-GGTTCTCCAGGAGAAGCTTGGT-3' |
| <i>Il4</i> (3)     | For: 5'-CCACGGATGCGACAAAATC-3'<br>Rev: 5'-TGTTCTTCGTTGCTGTGAGGAC-3'        |
| <i>Il5</i> (4)     | For: 5'-TGACAAGCAATGAGACGATGAGG-3'<br>Rev: 5'-ACCCCCACGGACAGTTTGATTC-3'    |
| <i>Il13</i> (5)    | For: 5'-GCAACATCACACAAGACCAGA-3'<br>Rev: 5'-GTCAGGGAATCCAGGGCTAC-3'        |
| <i>Gata3</i> (6)   | For: 5'-AGTTCGCGCAGGATGTCC-3'<br>Rev: 5'-AGAACCGGCCCTTATCAA-3'             |
| <i>Il1b</i> (7)    | For: 5'-CAACCAACAAGTGATATTCTCCATG-3'<br>Rev: 5'-GATCCACACTCTCCAGCTGCA-3'   |
| <i>Il12p40</i> (3) | For: 5'-AAAGGCTGGGTATCGGTGG-3'<br>Rev: 5'-ACTGGCTGTGCTGGA ACTCC-3'         |
| <i>Tnfa</i> (8)    | For: 5'-AAGGGAGAGTGGTCAGTTGCC-3'                                           |

---

*Tbet* (6) Rev: 5'-CCTCAGGGAAGAGTCTGGAAAGG-3'  
For: 5'-TTCTCTGTTTGGCTGGCTGTT-3'  
Rev: 5'-GGATTCTGGGGTTTACTTCTT-3'

*Inos* (9) For: 5'-CACCAAGCTGAACTTGAGCGA-3'  
Rev: 5'-CCATAGGAAAAGACTGCACCGA-3'

*Arg1* (9) For: 5'-CAGAAGAATGGAAGAGTCAG-3'  
Rev: 5'-CAGATATGCAGGGAGTCACC-3'

*Chi3l3 [Ym1]* (10) For: 5'-CATGAGCAAGACTTGCGTGAC-3'  
Rev: 5'-CATGAGCAAGACTTGCGTGAC-3'

*Retnla [Fizz1]* (10) For: 5'-TCCCAGTGAATACTGATGAGA-3'  
Rev: 5'-CCACTCTGGATCTCCCAAGA-3'

*Mmp12* (9) For: 5'-TCAATTGGAATATGACCCCCTG-3'  
Rev: 5'-ACCAGCAAGCACCCCTTCACTAC-3'

*Il4ra* (11) For: 5'-GAGTGAGTGGAGTCCTAGCATC-3'  
Rev: 5'-GCTGAAGTAACAGAACAGGC-3'

*Il13ra1* (11) For: 5'-GCAGCCTGGAGAAAAGTCGTCAAT-3'  
Rev: 5'-ACAGCGTCGGCAAGAACACCA-3'

*Il13ra2* (12) For: 5'-TGCAGATGATGGAATTTGGA -3'  
Rev: 5'-GCTCAATGTGGGTTTCAGGTT-3'

*Ifng* (13) For: 5' -AGCTCATCCGGTGGTCCAC-3 '  
Rev: 5'-AAAATTCAAATAGTGCTGGCAGAA-3'

*Cxcl9* For: 5'-TCGAGGAACCCTAGTGATAA-3'  
Rev: 5'-ACTGTTTGAGGTCTTTGAGG-3'

*Cxcl10* For: 5'-GTCTGAGTGGGACTCAAGG-3'

---

---

*Irf1* Rev: 5'-TGATTTCAAGCTTCCCTATG-3'  
For: 5'- AGAGAGAAAGTCCAAGTCCAGC -3'  
Rev: 5'- GTCCATCAGAGAAAGTGTCCG -3'

*Ifnb* For: 5'- TACGTCTCCTGGATGAACTC -3'  
Rev: 5'- TCTTCAAGTGGAGAGCAGTT -3'

*Socs1 (14)* For: 5'-ACCTTCTTGGTGCGCGAC -3'  
Rev: 5'- AAGCCATCTTCACGCTGAGC -3'

*Rantes* For: 5'- GGAGTATTTCTACACCAGCAGC -3'  
Rev: 5'- TCTTGAACCCACTTCTTCTCTG -3'

*Fasl* For: 5'- GGTGCTAATGGAGGAGAAGAGG -3'  
Rev: 5'- CACTGGTAAGATTGAATACTGCC -3'

*Fas* For: 5'- ACTTCTACTGCGATTCTCCTGG -3'  
Rev: 5'- TGTATTGCTGGTTGCTGTGC -3'

*Tnfr1* For: 5'- CCCCAAATGGAAATGTGCTATG -3'  
Rev: 5'- GGATGCTACAGATGCGGTGG -3'

*Ccl3* For: 5'-CCAATTCATCGTTGACTATTT-3'  
Rev: 5'-CTTGGACCCAGGTCTCTT-3'

*Ccl4* For: 5'-CCTGCTGTTTCTCTTACACC-3'  
Rev: 5'-TTTGGTCAGGAATACCACAG-3'

*Mcp1* For: 5'- TCTGCCCTAAGGTCTTCAGCAC -3'  
Rev: 5'- GCTTGAGGTGGTTGTGGAAAAG -3'

*Il17a(6)* For: 5'- CAGACTACCTCAACCGTTCC -3'  
Rev: 5'- AGCATCTTCTCGACCCTGAA -3'

---

\*Purchased from Real Time Primers, LLC (Elkins Park, PA)

## SUPPLEMENTARY TABLE 2

Correlation coefficient matrix for 10 genes from Figure 9A and C in a cohort of 45 patients with biliary atresia.

|                     |                                            | <b>CCR4</b>                                                  | <b>IL18</b>                                                  | <b>CD74</b>                                                      | <b>CD86</b>                                                      | <b>AREG/AREGB-1</b>                                              | <b>IL4R</b>  | <b>BCL3</b> | <b>BCL6</b> | <b>IL1RL1</b> | <b>IL6</b> |
|---------------------|--------------------------------------------|--------------------------------------------------------------|--------------------------------------------------------------|------------------------------------------------------------------|------------------------------------------------------------------|------------------------------------------------------------------|--------------|-------------|-------------|---------------|------------|
| <b>CCR4</b>         | Pearson's r<br>R Std Error<br>t<br>p-value | 1.                                                           |                                                              |                                                                  |                                                                  |                                                                  |              |             |             |               |            |
| <b>IL18</b>         | Pearson's r<br>R Std Error<br>t<br>p-value | -0.094<br>0.023<br>-0.623<br>0.535                           | 1.                                                           |                                                                  |                                                                  |                                                                  |              |             |             |               |            |
| <b>CD74</b>         | Pearson's r<br>R Std Error<br>t<br>p-value | 0.165<br>0.022<br>1.100<br>0.277                             | <b>0.450</b><br><b>0.018</b><br><b>3.311</b><br><b>0.001</b> | 1.                                                               |                                                                  |                                                                  |              |             |             |               |            |
| <b>CD86</b>         | Pearson's r<br>R Std Error<br>t<br>p-value | 0.264<br>0.021<br>1.801<br>0.078                             | <b>0.341</b><br><b>0.020</b><br><b>2.380</b><br><b>0.021</b> | <b>0.634</b><br><b>0.013</b><br><b>5.381</b><br><b>&lt;0.001</b> | 1.                                                               |                                                                  |              |             |             |               |            |
| <b>AREG/AREGB-1</b> | Pearson's r<br>R Std Error<br>t<br>p-value | <b>0.384</b><br><b>0.019</b><br><b>2.727</b><br><b>0.009</b> | <b>0.316</b><br><b>0.020</b><br><b>2.186</b><br><b>0.034</b> | 0.140<br>0.029<br>0.928<br>0.358                                 | <b>0.535</b><br><b>0.016</b><br><b>4.153</b><br><b>&lt;0.001</b> | 1.                                                               |              |             |             |               |            |
| <b>IL4R</b>         | Pearson's r<br>R Std Error<br>t<br>p-value | 0.124<br>0.022<br>0.824<br>0.414                             | 0.117<br>0.022<br>0.778<br>0.440                             | -0.087<br>0.023<br>-0.573<br>0.569                               | 0.153<br>0.022<br>1.019<br>0.313                                 | <b>0.612</b><br><b>0.014</b><br><b>5.078</b><br><b>&lt;0.001</b> | 1.           |             |             |               |            |
| <b>BCL3</b>         | Pearson's r                                | <b>0.331</b>                                                 | 0.143                                                        | 0.075                                                            | <b>0.331</b>                                                     | <b>0.646</b>                                                     | <b>0.866</b> | 1.          |             |               |            |

|               |             |       |       |        |        |        |        |        |        |        |
|---------------|-------------|-------|-------|--------|--------|--------|--------|--------|--------|--------|
|               | R Std Error | 0.021 | 0.022 | 0.0231 | 0.020  | 0.013  | 0.005  |        |        |        |
|               | t           | 2.307 | 0.950 | 0.494  | 2.302  | 5.556  | 11.385 |        |        |        |
|               | p-value     | 0.025 | 0.347 | 0.623  | 0.026  | <0.001 | <0.001 |        |        |        |
| <b>BCL6</b>   | Pearson's r | 0.127 | 0.113 | -0.025 | 0.216  | 0.549  | 0.835  | 0.815  | 1.     |        |
|               | R Std Error | 0.022 | 0.022 | 0.023  | 0.022  | 0.016  | 0.007  | 0.007  |        |        |
|               | t           | 0.844 | 0.752 | -0.167 | 1.450  | 4.310  | 9.953  | 9.237  |        |        |
|               | p-value     | 0.402 | 0.456 | 0.868  | 0.154  | <0.001 | <0.001 | <0.001 |        |        |
| <b>IL1RL1</b> | Pearson's r | 0.248 | 0.172 | 0.094  | 0.587  | 0.846  | 0.712  | 0.699  | 0.656  | 1.     |
|               | R Std Error | 0.021 | 0.022 | 0.0230 | 0.015  | 0.006  | 0.011  | 0.011  | 0.013  |        |
|               | t           | 1.684 | 1.151 | 0.621  | 4.750  | 10.431 | 6.660  | 6.421  | 5.711  |        |
|               | p-value     | 0.099 | 0.256 | 0.537  | <0.001 | <0.001 | <0.001 | <0.001 | <0.001 |        |
| <b>IL6</b>    | Pearson's r | 0.318 | 0.131 | -0.062 | 0.373  | 0.752  | 0.544  | 0.647  | 0.652  | 0.692  |
|               | R Std Error | 0.021 | 0.022 | 0.023  | 0.020  | 0.010  | 0.016  | 0.013  | 0.013  | 0.012  |
|               | t           | 2.206 | 0.870 | -0.407 | 2.640  | 7.493  | 4.256  | 5.564  | 5.639  | 6.293  |
|               | p-value     | 0.032 | 0.388 | 0.685  | 0.011  | <0.001 | <0.001 | <0.001 | <0.001 | <0.001 |

### SUPPLEMENTARY TABLE 3

Correlation coefficient matrix for 10 genes from Figure 9A and C in a cohort of 7 normal controls.

|                     |                    | <b>CCR4</b> | <b>IL18</b> | <b>CD74</b>  | <b>CD86</b> | <b>AREG/AREGB-1</b> | <b>IL4R</b> | <b>BCL3</b> | <b>BCL6</b> | <b>IL1RL1</b> | <b>IL6</b> |
|---------------------|--------------------|-------------|-------------|--------------|-------------|---------------------|-------------|-------------|-------------|---------------|------------|
| <b>CCR4</b>         | <b>Pearson's r</b> | 1.          |             |              |             |                     |             |             |             |               |            |
|                     | <i>R Std Error</i> |             |             |              |             |                     |             |             |             |               |            |
|                     | <i>t</i>           |             |             |              |             |                     |             |             |             |               |            |
|                     | <i>p-value</i>     |             |             |              |             |                     |             |             |             |               |            |
| <b>IL18</b>         | <b>Pearson's r</b> | -0.537      | 1.          |              |             |                     |             |             |             |               |            |
|                     | <i>R Std Error</i> | 0.142       |             |              |             |                     |             |             |             |               |            |
|                     | <i>t</i>           | -1.425      |             |              |             |                     |             |             |             |               |            |
|                     | <i>p-value</i>     | 0.214       |             |              |             |                     |             |             |             |               |            |
| <b>CD74</b>         | <b>Pearson's r</b> | 0.748       | -0.310      | 1.           |             |                     |             |             |             |               |            |
|                     | <i>R Std Error</i> | 0.088       | 0.181       |              |             |                     |             |             |             |               |            |
|                     | <i>t</i>           | 2.521       | -0.729      |              |             |                     |             |             |             |               |            |
|                     | <i>p-value</i>     | 0.053       | 0.499       |              |             |                     |             |             |             |               |            |
| <b>CD86</b>         | <b>Pearson's r</b> | 0.503       | 0.271       | 0.275        | 1.          |                     |             |             |             |               |            |
|                     | <i>R Std Error</i> | 0.149       | 0.185       | 0.185        |             |                     |             |             |             |               |            |
|                     | <i>t</i>           | 1.301       | 0.631       | 0.641        |             |                     |             |             |             |               |            |
|                     | <i>p-value</i>     | 0.250       | 0.556       | 0.550        |             |                     |             |             |             |               |            |
| <b>AREG/AREGB-1</b> | <b>Pearson's r</b> | 0.032       | 0.050       | 0.258        | -0.447      | 1.                  |             |             |             |               |            |
|                     | <i>R Std Error</i> | 0.200       | 0.199       | 0.187        | 0.160       |                     |             |             |             |               |            |
|                     | <i>t</i>           | 0.072       | 0.113       | 0.596        | -1.118      |                     |             |             |             |               |            |
|                     | <i>p-value</i>     | 0.945       | 0.915       | 0.577        | 0.315       |                     |             |             |             |               |            |
| <b>IL4R</b>         | <b>Pearson's r</b> | 0.431       | -0.272      | <b>0.770</b> | -0.059      | 0.421               | 1.          |             |             |               |            |
|                     | <i>R Std Error</i> | 0.163       | 0.185       | <b>0.081</b> | 0.199       | 0.165               |             |             |             |               |            |

|               |                    |        |        |        |        |        |        |       |        |       |    |
|---------------|--------------------|--------|--------|--------|--------|--------|--------|-------|--------|-------|----|
|               | <i>t</i>           | 1.068  | -0.631 | 2.701  | -0.131 | 1.038  |        |       |        |       |    |
|               | <i>p-value</i>     | 0.334  | 0.556  | 0.043  | 0.901  | 0.347  |        |       |        |       |    |
| <b>BCL3</b>   | <b>Pearson's r</b> | 0.001  | 0.114  | 0.585  | -0.047 | 0.062  | 0.741  | 1.    |        |       |    |
|               | <i>R Std Error</i> | 0.200  | 0.197  | 0.132  | 0.200  | 0.199  | 0.090  |       |        |       |    |
|               | <i>t</i>           | 0.003  | 0.256  | 1.612  | -0.104 | 0.139  | 2.470  |       |        |       |    |
|               | <i>p-value</i>     | 0.998  | 0.808  | 0.168  | 0.921  | 0.895  | 0.057  |       |        |       |    |
| <b>BCL6</b>   | <b>Pearson's r</b> | -0.025 | 0.145  | 0.472  | -0.337 | 0.456  | 0.323  | 0.554 | 1.     |       |    |
|               | <i>R Std Error</i> | 0.200  | 0.196  | 0.155  | 0.177  | 0.158  | 0.179  | 0.139 |        |       |    |
|               | <i>t</i>           | -0.056 | 0.327  | 1.198  | -0.800 | 1.145  | 0.762  | 1.489 |        |       |    |
|               | <i>p-value</i>     | 0.958  | 0.757  | 0.285  | 0.460  | 0.304  | 0.480  | 0.197 |        |       |    |
| <b>IL1RL1</b> | <b>Pearson's r</b> | -0.457 | 0.745  | -0.468 | 0.260  | -0.216 | -0.171 | 0.096 | -0.205 | 1.    |    |
|               | <i>R Std Error</i> | 0.158  | 0.089  | 0.156  | 0.186  | 0.191  | 0.194  | 0.198 | 0.192  |       |    |
|               | <i>t</i>           | -1.149 | 2.499  | -1.183 | 0.603  | -0.495 | -0.388 | 0.215 | -0.467 |       |    |
|               | <i>p-value</i>     | 0.303  | 0.055  | 0.290  | 0.573  | 0.642  | 0.714  | 0.838 | 0.660  |       |    |
| <b>IL6</b>    | <b>Pearson's r</b> | 0.411  | -0.164 | 0.316  | 0.439  | -0.573 | 0.302  | 0.419 | -0.044 | 0.300 | 1. |
|               | <i>R Std Error</i> | 0.166  | 0.195  | 0.180  | 0.161  | 0.134  | 0.182  | 0.165 | 0.200  | 0.182 |    |
|               | <i>t</i>           | 1.007  | -0.371 | 0.746  | 1.094  | -1.564 | 0.709  | 1.032 | -0.098 | 0.703 |    |
|               | <i>p-value</i>     | 0.360  | 0.726  | 0.489  | 0.324  | 0.179  | 0.510  | 0.349 | 0.926  | 0.514 |    |

## REFERENCES

1. Fontenot, J.D., Gavin, M.A., and Rudensky, A.Y. 2003. Foxp3 programs the development and function of CD4+CD25+ regulatory T cells. *Nat Immunol* 4:330-336.
2. Morimoto, M., Zhao, A., Madden, K.B., Dawson, H., Finkelman, F.D., Mentink-Kane, M., Urban, J.F., Jr., Wynn, T.A., and Shea-Donohue, T. 2006. Functional importance of regional differences in localized gene expression of receptors for IL-13 in murine gut. *J Immunol* 176:491-495.
3. Shivakumar, P., Campbell, K.M., Sabla, G.E., Miethke, A., Tiao, G., McNeal, M.M., Ward, R.L., and Bezerra, J.A. 2004. Obstruction of extrahepatic bile ducts by lymphocytes is regulated by IFN-gamma in experimental biliary atresia. *J Clin Invest* 114:322-329.
4. Ramalingam, T.R., Pesce, J.T., Sheikh, F., Cheever, A.W., Mentink-Kane, M.M., Wilson, M.S., Stevens, S., Valenzuela, D.M., Murphy, A.J., Yancopoulos, G.D., et al. 2008. Unique functions of the type II interleukin 4 receptor identified in mice lacking the interleukin 13 receptor alpha1 chain. *Nat Immunol* 9:25-33.
5. Moisan, J., Grenningloh, R., Bettelli, E., Oukka, M., and Ho, I.C. 2007. Ets-1 is a negative regulator of Th17 differentiation. *J Exp Med* 204:2825-2835.
6. Villarino, A.V., Artis, D., Bezbradica, J.S., Miller, O., Saris, C.J., Joyce, S., and Hunter, C.A. 2008. IL-27R deficiency delays the onset of colitis and protects from helminth-induced pathology in a model of chronic IBD. *Int Immunol* 20:739-752.
7. Ishigame, H., Kakuta, S., Nagai, T., Kadoki, M., Nambu, A., Komiyama, Y., Fujikado, N., Tanahashi, Y., Akitsu, A., Kotaki, H., et al. 2009. Differential roles of interleukin-17A and -17F in host defense against mucoepithelial bacterial infection and allergic responses. *Immunity* 30:108-119.
8. Shivakumar, P., Sabla, G., Mohanty, S., McNeal, M., Ward, R., Stringer, K., Caldwell, C., Chougnet, C., and Bezerra, J.A. 2007. Effector role of neonatal hepatic CD8+ lymphocytes in epithelial injury and autoimmunity in experimental biliary atresia. *Gastroenterology* 133:268-277.



9. Kahnert, A., Seiler, P., Stein, M., Bandermann, S., Hahnke, K., Mollenkopf, H., and Kaufmann, S.H. 2006. Alternative activation deprives macrophages of a coordinated defense program to *Mycobacterium tuberculosis*. *Eur J Immunol* 36:631-647.
10. Sandler, N.G., Mentink-Kane, M.M., Cheever, A.W., and Wynn, T.A. 2003. Global gene expression profiles during acute pathogen-induced pulmonary inflammation reveal divergent roles for Th1 and Th2 responses in tissue repair. *J Immunol* 171:3655-3667.
11. Chiaramonte, M.G., Mentink-Kane, M., Jacobson, B.A., Cheever, A.W., Whitters, M.J., Goad, M.E., Wong, A., Collins, M., Donaldson, D.D., Grusby, M.J., et al. 2003. Regulation and function of the interleukin 13 receptor alpha 2 during a T helper cell type 2-dominant immune response. *J Exp Med* 197:687-701.
12. Jaruga, B., Hong, F., Sun, R., Radaeva, S., and Gao, B. 2003. Crucial role of IL-4/STAT6 in T cell-mediated hepatitis: up-regulating eotaxins and IL-5 and recruiting leukocytes. *J Immunol* 171:3233-3244.
13. Zheng, Y., Danilenko, D.M., Valdez, P., Kasman, I., Eastham-Anderson, J., Wu, J., and Ouyang, W. 2007. Interleukin-22, a T(H)17 cytokine, mediates IL-23-induced dermal inflammation and acanthosis. *Nature* 445:648-651.
14. Yu, C.R., Mahdi, R.M., Ebong, S., Vistica, B.P., Chen, J., Guo, Y., Gery, I., and Egwuagu, C.E. 2004. Cell proliferation and STAT6 pathways are negatively regulated in T cells by STAT1 and suppressors of cytokine signaling. *J Immunol* 173:737-746.

# Supplementary Figure 1

A

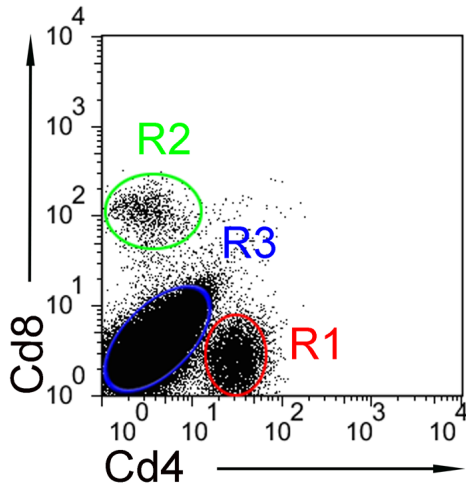

B

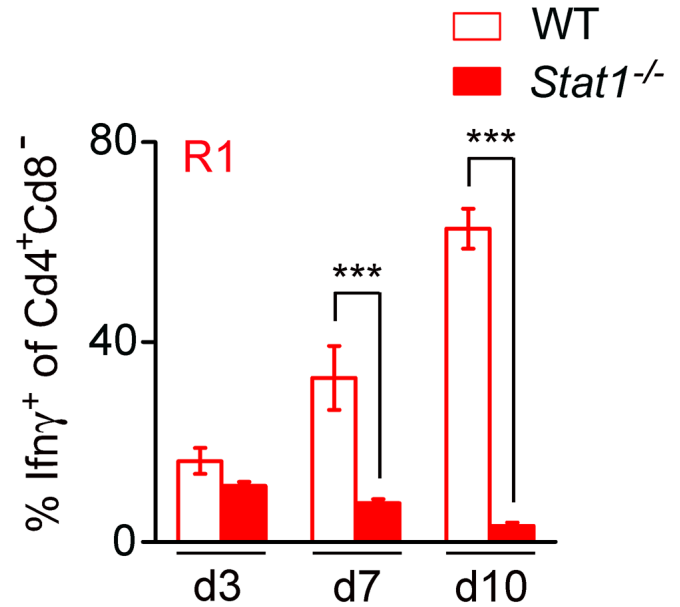

C

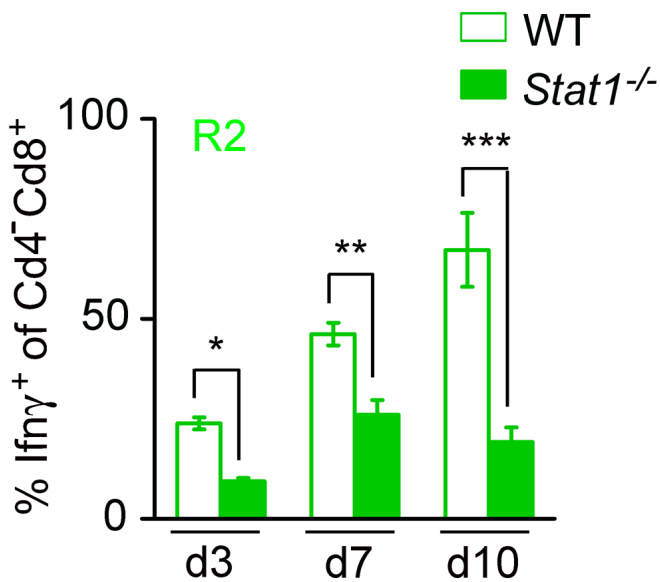

D

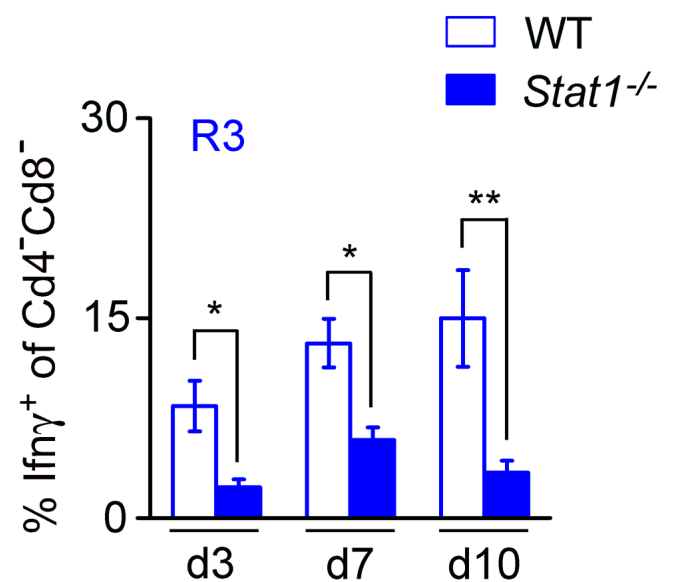

**Decrease in Ifnγ production in *Stat1*<sup>-/-</sup> mice after RRV.** Gating strategy for Cd4<sup>+</sup> (R1), Cd8<sup>+</sup> (R2) and Cd4<sup>-</sup>Cd8<sup>-</sup> (R3) hepatic mononuclear cells (A). The quantification of the percent of these cells expressing Ifnγ at days 3, 7 and 10 after RRV infection is higher in WT than *Stat1*<sup>-/-</sup> mice. \*P<0.05, \*\*P<0.01, \*\*\*P<0.001. Note that panel B is also in Figure 3B, but it is shown here to demonstrate the gating strategy to quantify these cells.

## Supplementary Figure 2

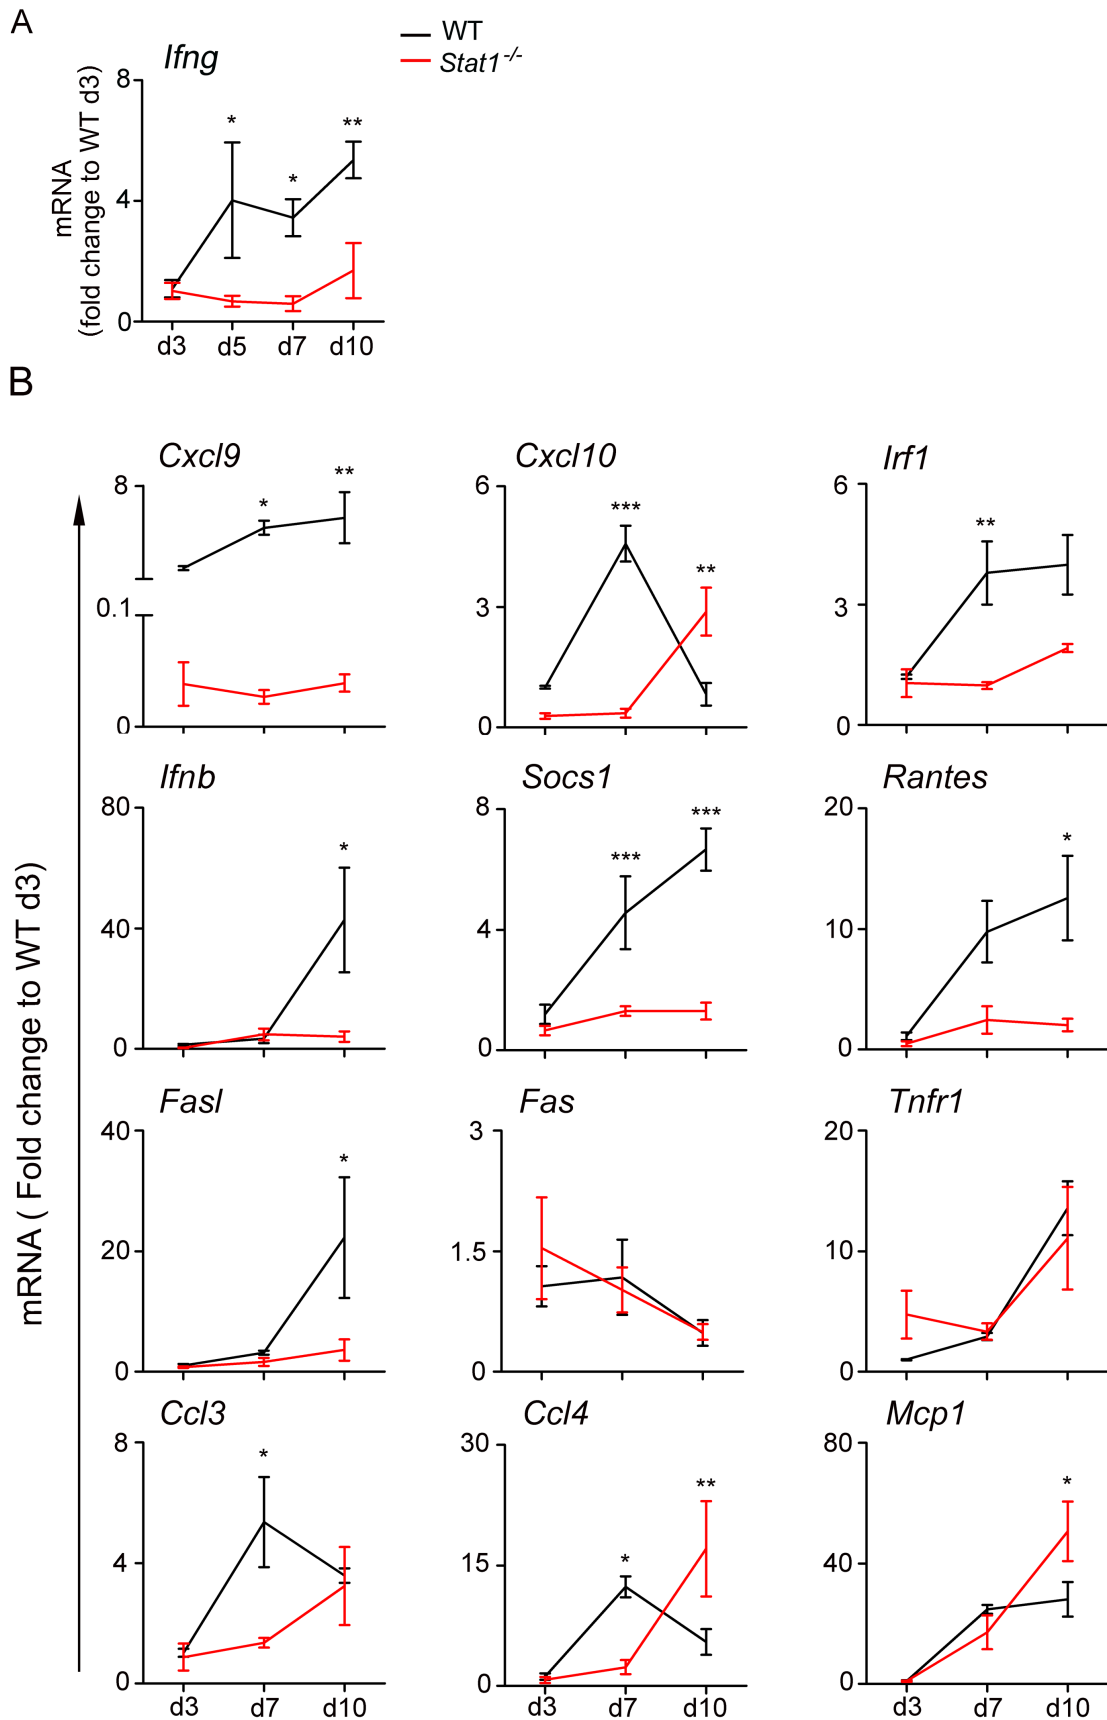

**mRNA expression for *Ifng* and target genes.** Individual graphs display the hepatic mRNA expression for *Ifng* (A) and *Ifng*-target genes (B) in WT and *Stat1*<sup>-/-</sup> mice at different time points after RRV challenge. mRNA expression for most genes is decreased in *Stat1*<sup>-/-</sup> livers when compared to WT. mRNA expression was first normalized to internal *Hprt* control and then normalized to the value from WT mice at day 3. N=3-4 livers per group and time point; \*P<0.05, \*\*P<0.01, \*\*\*P<0.001.

# Supplementary Figure 3

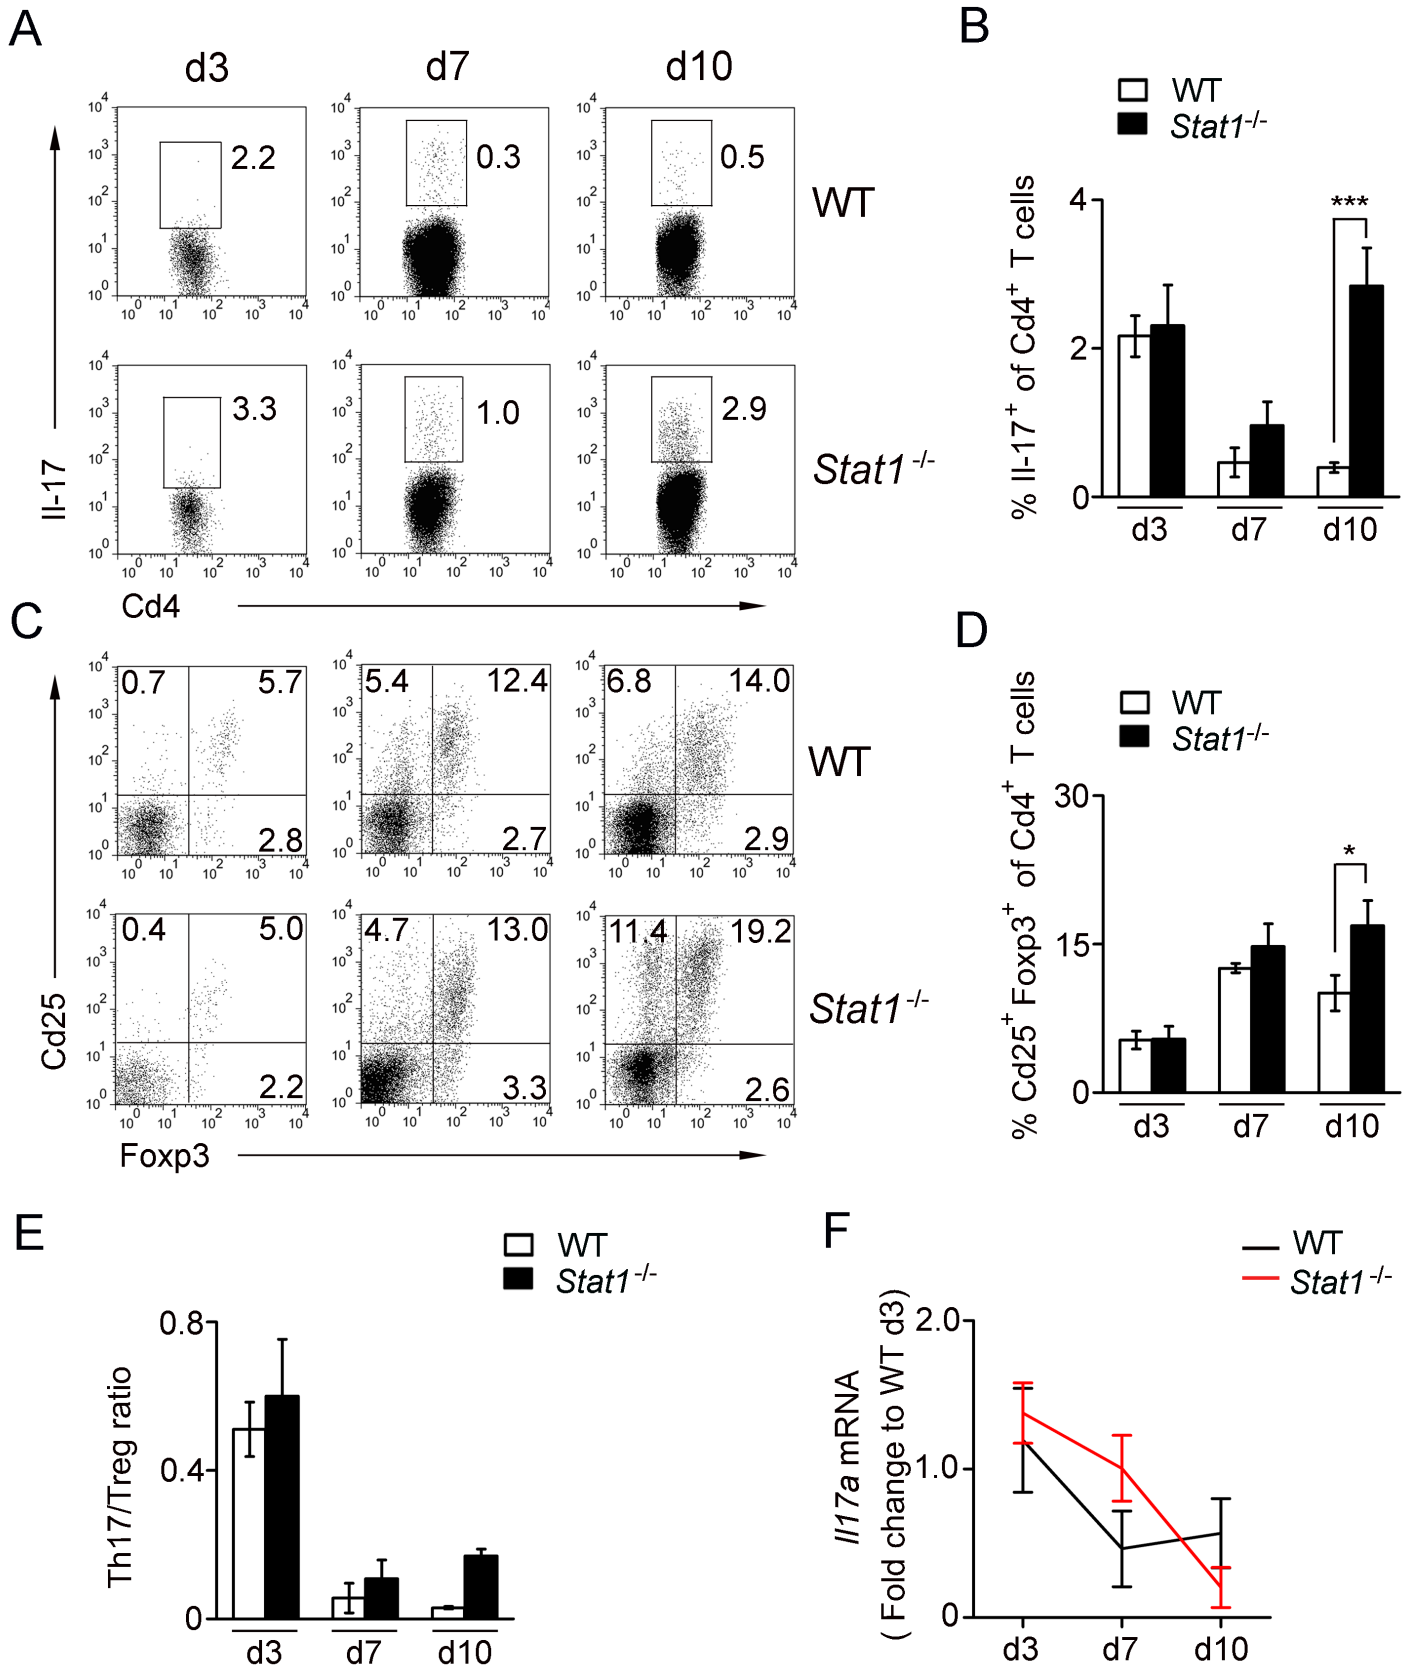

**Th17 expression in *Stat1*<sup>-/-</sup> mice after RRV.** Flow cytometric analysis showing the expression of IL-17 (A,B) or Cd25<sup>+</sup>Foxp3<sup>+</sup> (C,D) by hepatic Cd4<sup>+</sup> cells in WT and *Stat1*<sup>-/-</sup> mice at different time points after RRV. Panel E shows a Th17:Treg ratio below 1, and panel F shows a similar pattern of hepatic *Il17a* mRNA expression in both groups after RRV. Data are shown as representative dot plots (A,C) and mean±SEM (B,D); N=3 livers per group per time point; \*P<0.05, \*\*\*P<0.001.

## Supplementary Figure 4

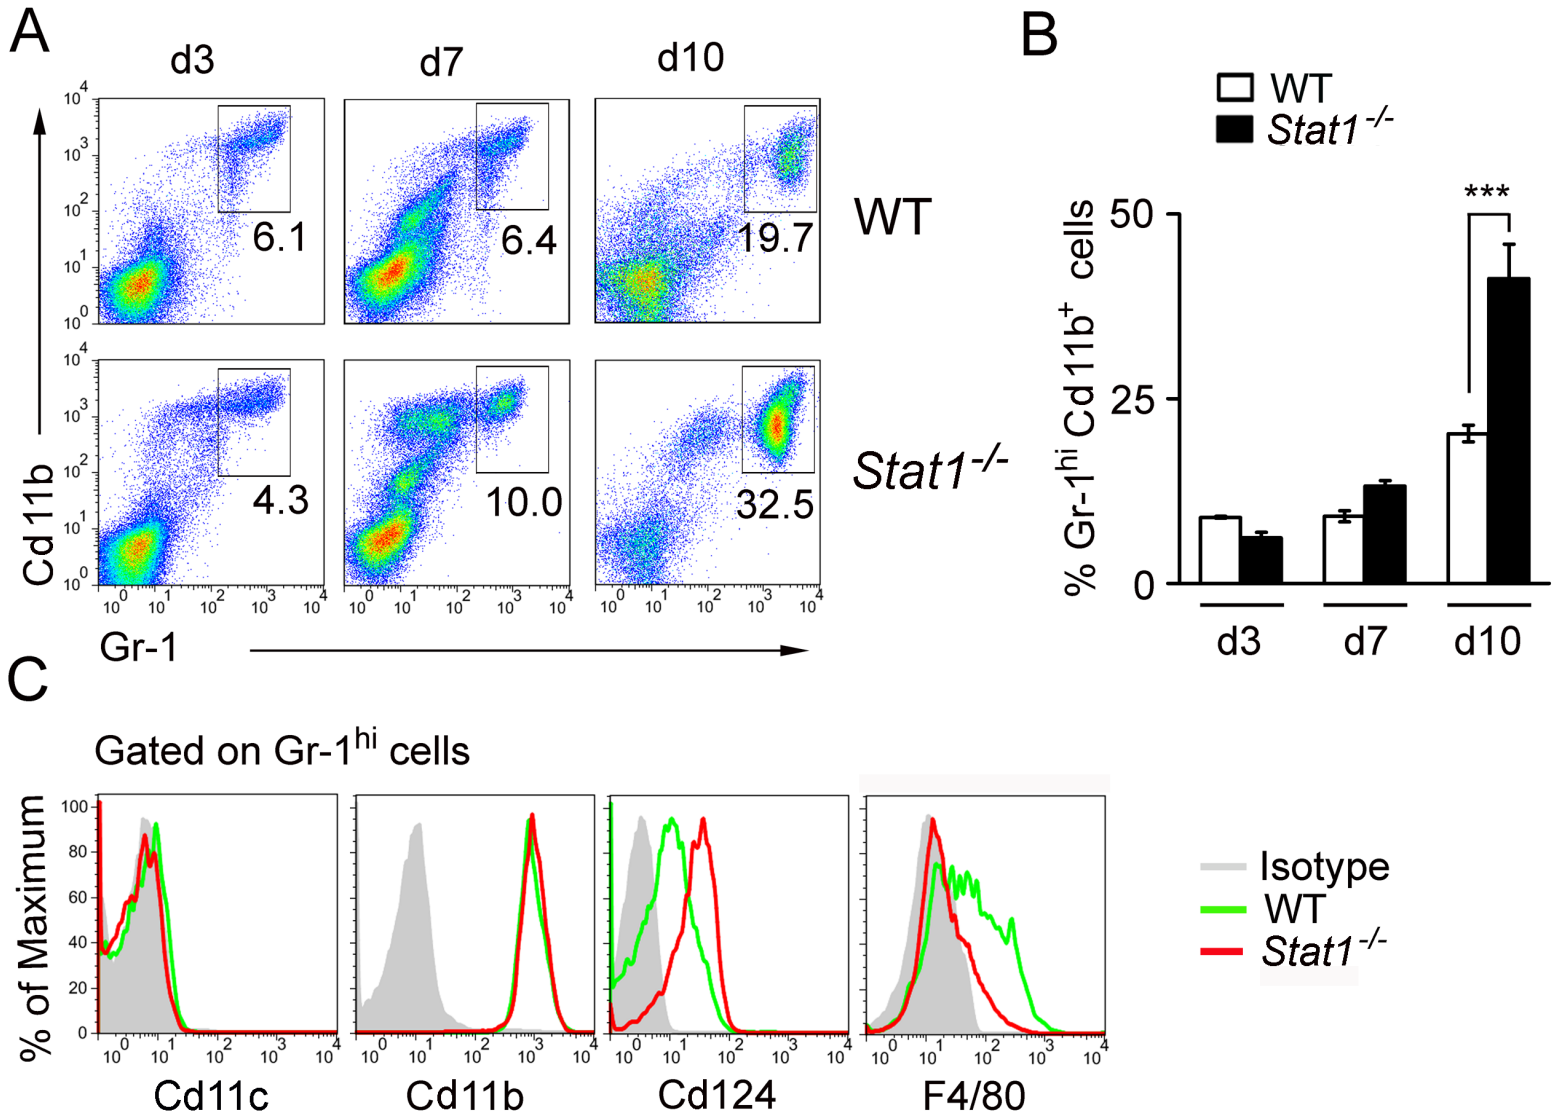

**Expression of IIR $\alpha$  and F4/80 in Gr-1<sup>hi</sup> cells in *Stat1*<sup>-/-</sup> livers after RRV.** Flow cytometry analyses show similar levels of Gr-1<sup>hi</sup> cells in WT and *Stat1*<sup>-/-</sup> livers 3 and 7 days after RRV, which increase in *Stat1*<sup>-/-</sup> at day 10 (A,B). Expression of markers linked to the myeloid-derived suppressor cell (MDSC) phenotype shows an increased number of Gr-1<sup>hi</sup> cells co-expressing Cd124 (IIR $\alpha$ ) in *Stat1*<sup>-/-</sup> livers but only few express F4/80<sup>+</sup> 10 days after RRV (C). N=6-10 livers per group and time point; experiments repeated twice; \*\*\*P<0.001.

### Supplementary Figure 5

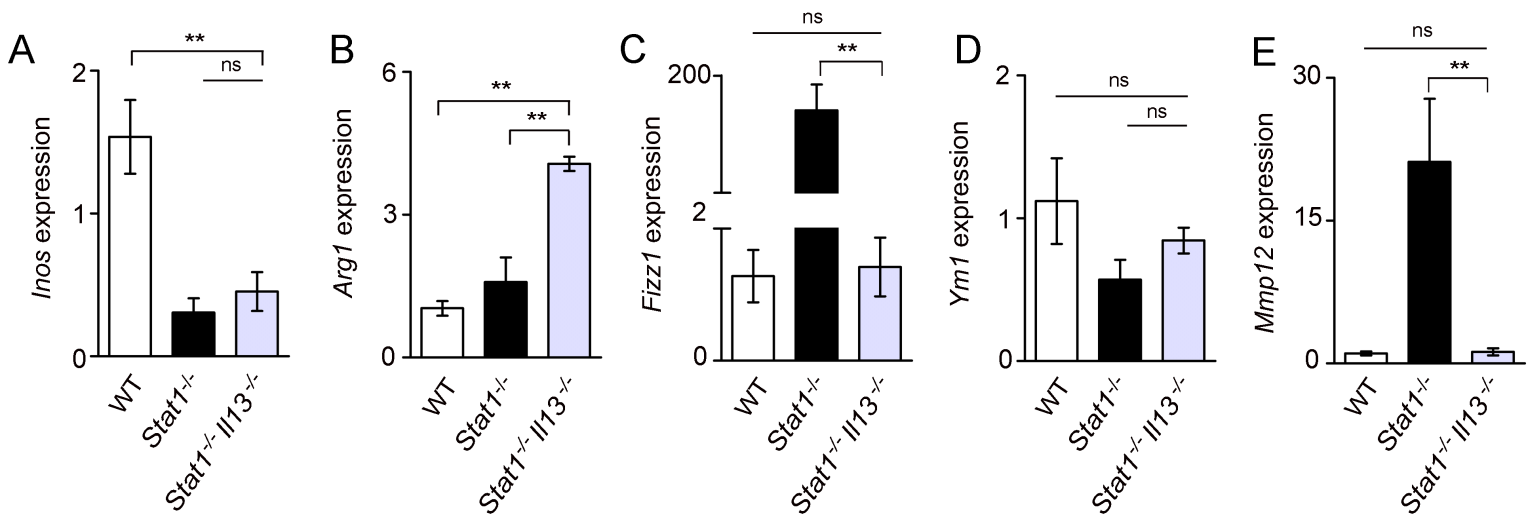

**Decreased M2 activation after depletion of Il-13 in *Stat1*<sup>-/-</sup> mice.** Hepatic mRNA expression for M1 and M2 genes in WT, *Stat1*<sup>-/-</sup> and *Stat1*<sup>-/-</sup>/*Il13*<sup>-/-</sup> mice 7 days after RRV. Values are expressed as a ratio to *Hprt* and then normalized to WT; N=3-5 livers per genotype; \*\*P<0.01; ns=no significant difference.

## Supplementary Figure 6

A

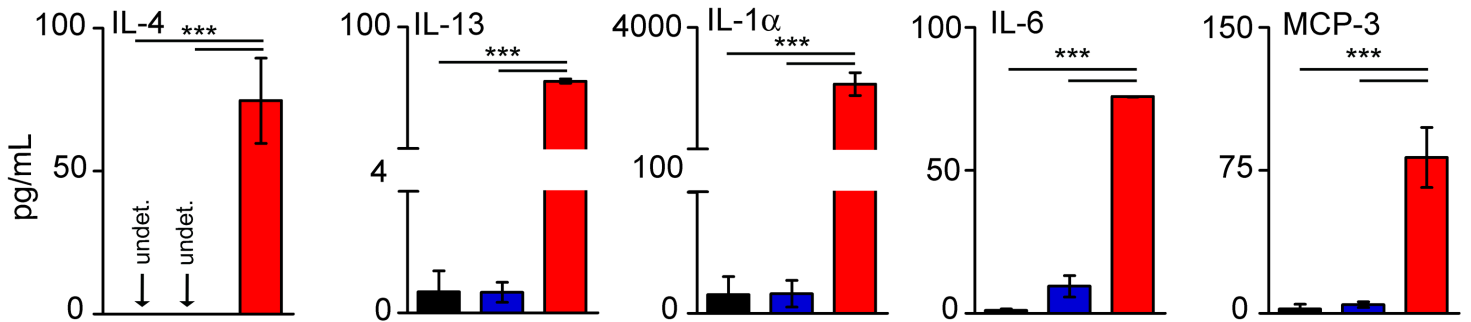

B

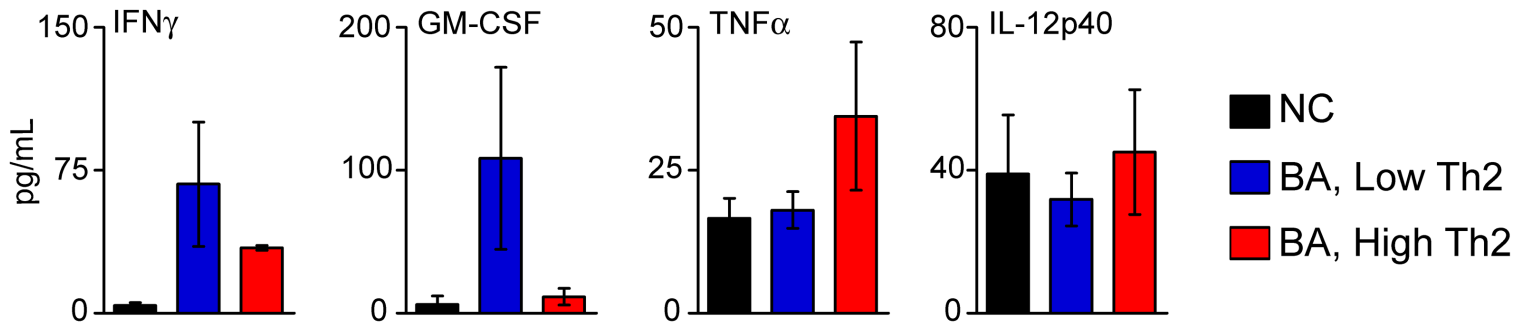

**Serum levels of Th1 and Th2 cytokines/chemokines at diagnosis of biliary atresia.** Mean ( $\pm$ S.E.) serum concentration of Th1 and Th2 cytokines/chemokines for infants at the time of diagnosis of biliary atresia (BA; age < 4 months) and age-matched normal infants (normal controls=NC). Data in panel A are shown in three groups: NC (N=3), BA Low Th2 group (N=9) and BA High Th2 group (N=2). \*\*\*P<0.001 (one-way ANOVA).
